# Supplementary material for: Investigations of possible prodrug structures for 2-(2-mercaptophenyl)tetrahydropyrimidines: reductive conversion from anti-HIV agents with pyrimidobenzothiazine and isothiazolopyrimidine scaffolds
Source: Royal Society of Chemistry journal article supplement (doi:10.1039/c5ob00301f), 2015-01-01
Supplement: c5ob00301f1.pdf [file c5ob00301f1.pdf]

*Supplementary Information*

**Investigations of possible prodrug structures for 2-(2-mercaptophenyl)tetrahydropyrimidines:  
reductive conversion from anti-HIV agents with pyrimidobenzothiazine and isothiazolopyrimidine  
scaffolds**

Shiho Okazaki,<sup>a</sup> Shinya Oishi,<sup>a\*</sup> Tsukasa Mizuhara,<sup>a</sup> Kazuya Shimura,<sup>b</sup>

Hiroto Murayama,<sup>b</sup> Hiroaki Ohno,<sup>a</sup> Masao Matsuoka,<sup>b</sup> Nobutaka Fujii<sup>a\*</sup>

<sup>a</sup> *Graduate School of Pharmaceutical Sciences, Kyoto University, Sakyo-ku, Kyoto 606-8501, Japan*

<sup>b</sup> *Institute for Virus Research, Kyoto University, Sakyo-ku, Kyoto 606-8507, Japan*

e-mail: soishi@pharm.kyoto-u.ac.jp (S.O.); nfujii@pharm.kyoto-u.ac.jp (N.F.)

**Table of Contents**

NMR spectra

S2

C:\Users\-\dŠw@<†%E@%\*@žu•ä\Desktop\~•¶\,›,İ'¼\NMR data\4a, J-167\J-167 0901 MeOH-1.als

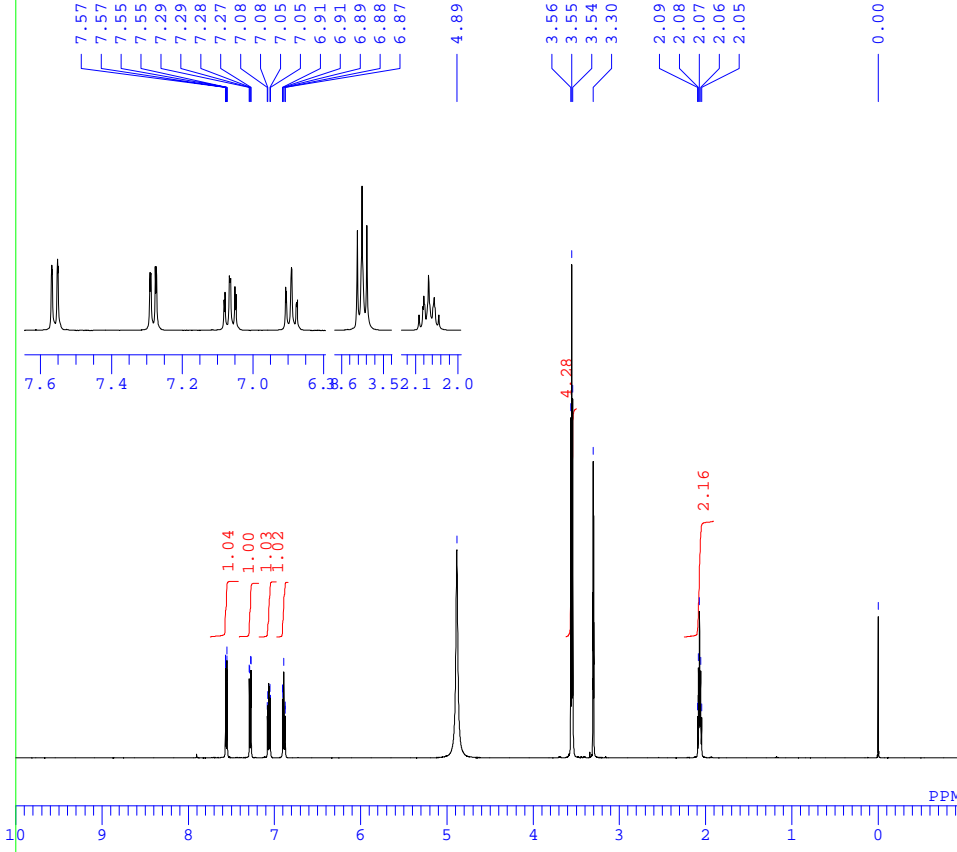

DFILE J-167 0901 MeOH-1.als  
 COMNT single\_pulse  
 DATIM 2014-09-01 18:44:35  
 OBNUC 1H  
 EXMOD single\_pulse.ex2  
 OBFREQ 500.16 MHz  
 OBSET 2.41 KHz  
 OBFIN 6.01 Hz  
 POINT 13107  
 FREQU 7507.39 Hz  
 SCANS 8  
 ACQTM 1.7459 sec  
 PD 5.0000 sec  
 PW1 6.82 usec  
 IRNUC 1H  
 CTEMP 23.5 c  
 SLVNT CD3OD  
 EXREF 0.00 ppm  
 BF 0.12 Hz  
 RGAIN 44

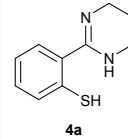

C:\Users\-\dŠw@<†%E@%\*@žu•ä\Desktop\~•¶\,›,İ'¼\NMR data\4a, J-167\J-167 C 0912-1.als

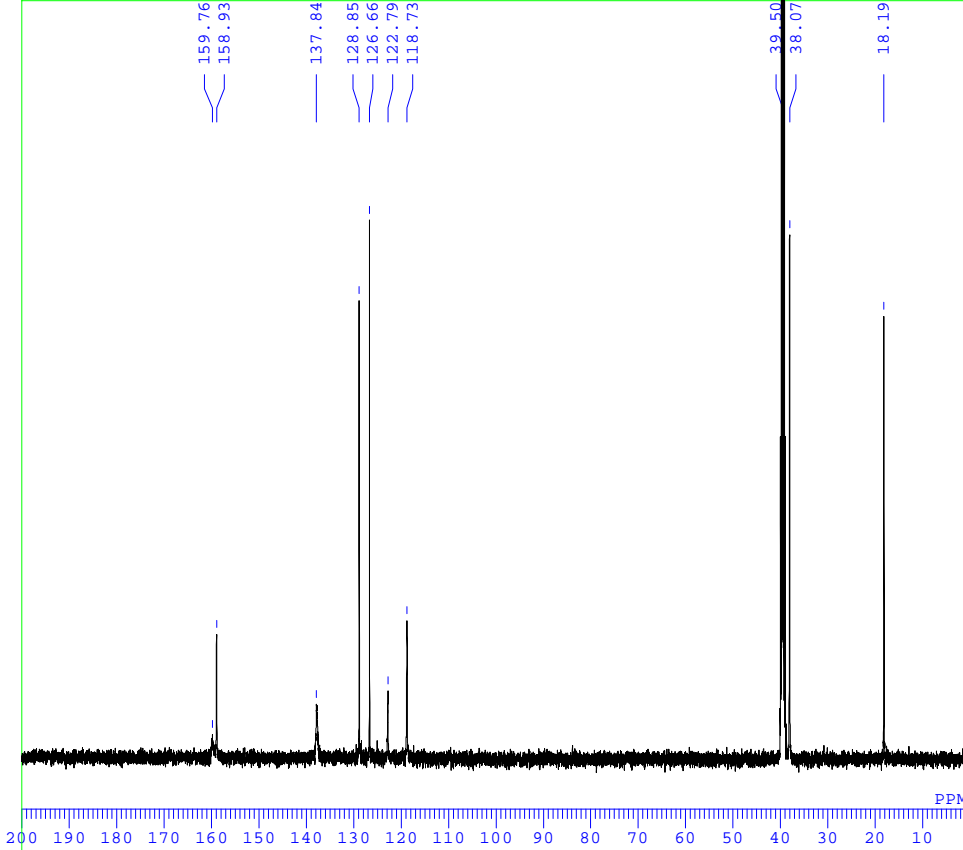

DFILE J-167 C 0912-1.als  
 COMNT single\_pulse\_decoupled\_gat  
 DATIM 2014-09-12 16:05:52  
 OBNUC 13C  
 EXMOD single\_pulse\_dec  
 OBFREQ 125.77 MHz  
 OBSET 7.87 KHz  
 OBFIN 4.21 Hz  
 POINT 26214  
 FREQU 31446.06 Hz  
 SCANS 1024  
 ACQTM 0.8336 sec  
 PD 2.0000 sec  
 PW1 3.50 usec  
 IRNUC 1H  
 CTEMP 22.6 c  
 SLVNT DMSO  
 EXREF 39.50 ppm  
 BF 1.20 Hz  
 RGAIN 50

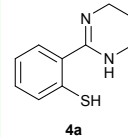

C:\Users\-\dŠw@<+&E@%\*èŽu•ä\Desktop\~•¶\,›,İ'¼\NMR data\4g, F-22\F-22 pure H-1.als

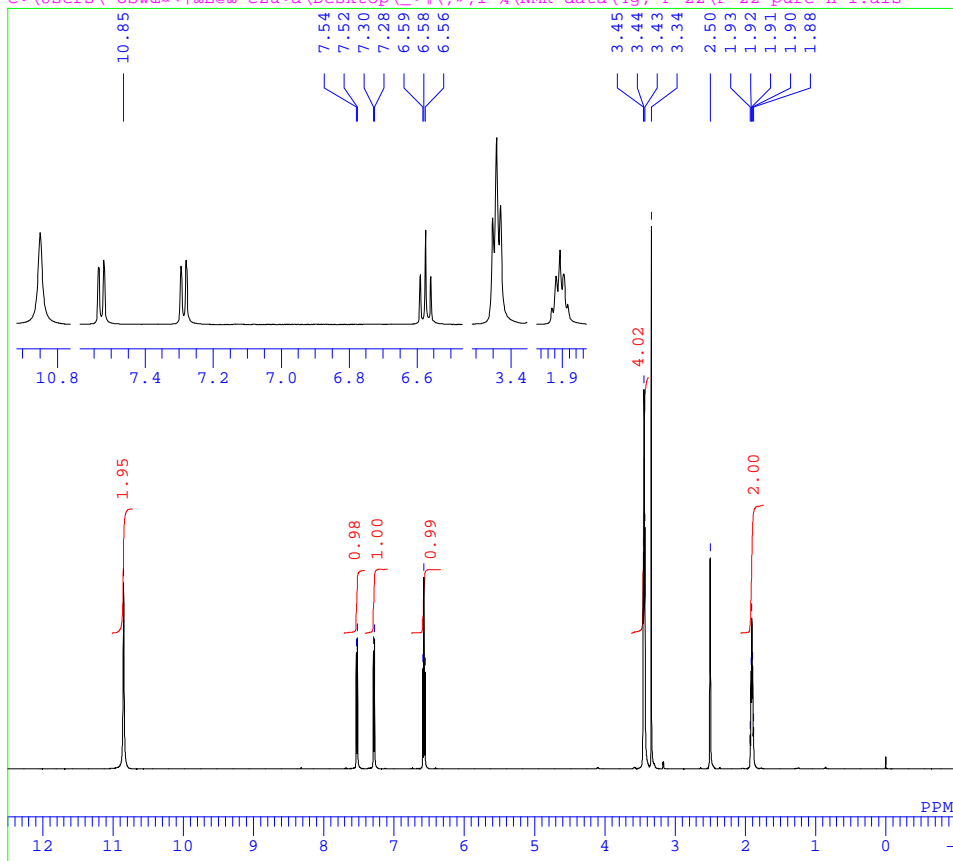

DFILE F-22 pure H-1.als  
 COMNT single\_pulse  
 DATIM 2014-08-06 11:05:30  
 OBNUC 1H  
 EXMOD single\_pulse.ex2  
 OBFRO 500.16 MHz  
 OBSSET 2.41 KHz  
 OBFIN 6.01 Hz  
 POINT 13107  
 FREQU 7507.39 Hz  
 SCANS 8  
 ACQTM 1.7459 sec  
 PD 5.0000 sec  
 PW1 6.82 usec  
 IRNUC 1H  
 CTEMP 23.2 c  
 SLVNT DMSO  
 EXREF 0.00 ppm  
 BF 0.12 Hz  
 RGAIN 42

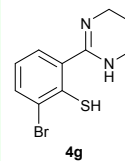

C:\Users\-\dŠw@<+&E@%\*èŽu•ä\Desktop\~•¶\,›,İ'¼\NMR data\4g, F-22\F-22 pure C-1.als

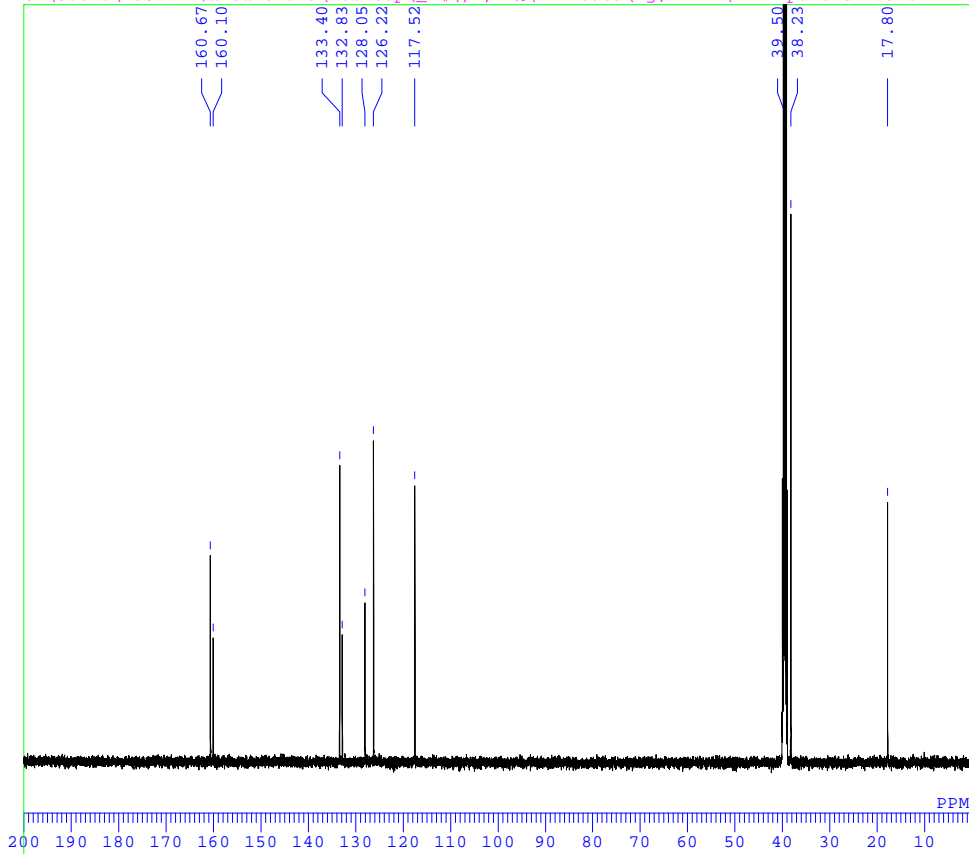

DFILE F-22 pure C-1.als  
 COMNT single\_pulse\_decoupled gat  
 DATIM 2014-08-06 11:54:39  
 OBNUC 13C  
 EXMOD single\_pulse\_dec  
 OBFRO 125.77 MHz  
 OBSSET 7.87 KHz  
 OBFIN 4.21 Hz  
 POINT 26214  
 FREQU 31446.06 Hz  
 SCANS 1024  
 ACQTM 0.8336 sec  
 PD 2.0000 sec  
 PW1 3.50 usec  
 IRNUC 1H  
 CTEMP 23.6 c  
 SLVNT DMSO  
 EXREF 39.50 ppm  
 BF 1.20 Hz  
 RGAIN 54

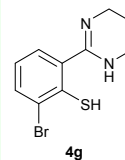

C:\Users\-\dŠw@<†&E@%\*@žu.ä\Desktop\~•¶\, > ĩ'¼\NMR data\7, F-72\F-72 H-2.als

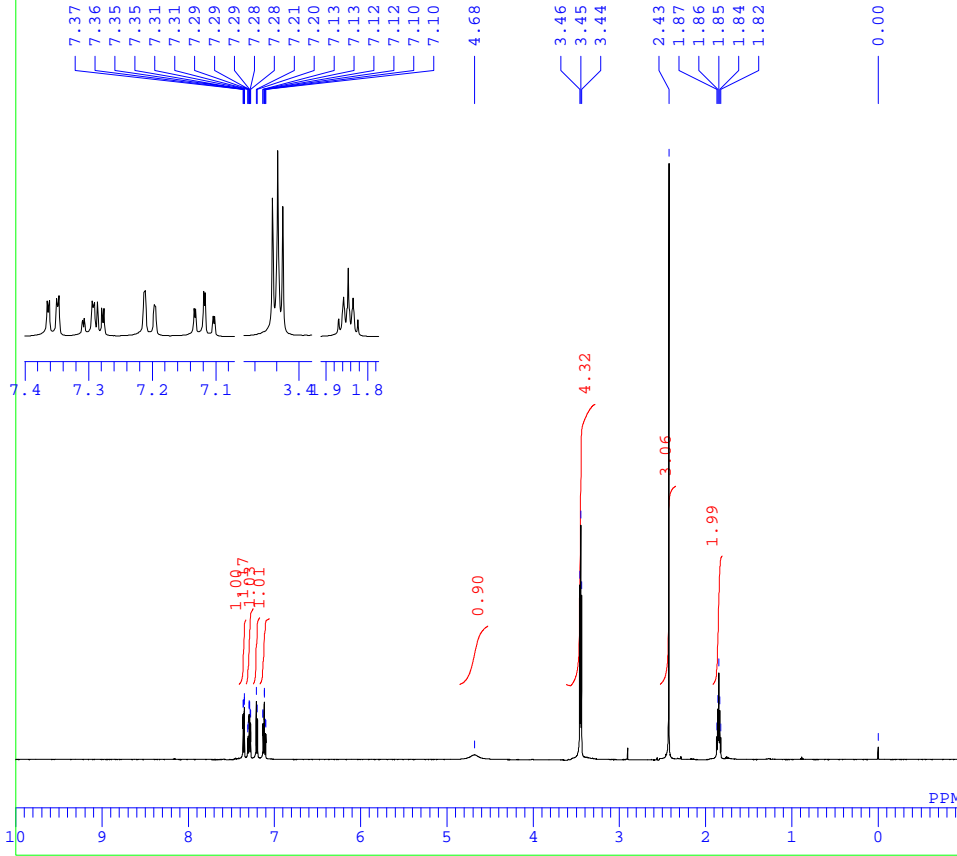

DFILE F-72 H-2.als  
 COMNT single\_pulse  
 DATIM 2014-10-14 10:41:49  
 OBNUC 1H  
 EXMOD single\_pulse.ex2  
 OBFREQ 500.16 MHz  
 OBSET 2.41 KHz  
 OBFIN 6.01 Hz  
 POINT 13107  
 FREQU 7507.39 Hz  
 SCANS 8  
 ACQTM 1.7459 sec  
 PD 5.0000 sec  
 PW1 6.82 usec  
 IRNUC 1H  
 CTEMP 22.7 c  
 SLVNT CDCL3  
 EXREF 0.00 ppm  
 BF 0.12 Hz  
 RGAIN 38

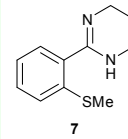

C:\Users\-\dŠw@<†&E@%\*@žu.ä\Desktop\~•¶\, > ĩ'¼\NMR data\7, F-72\F-72 C-1.als

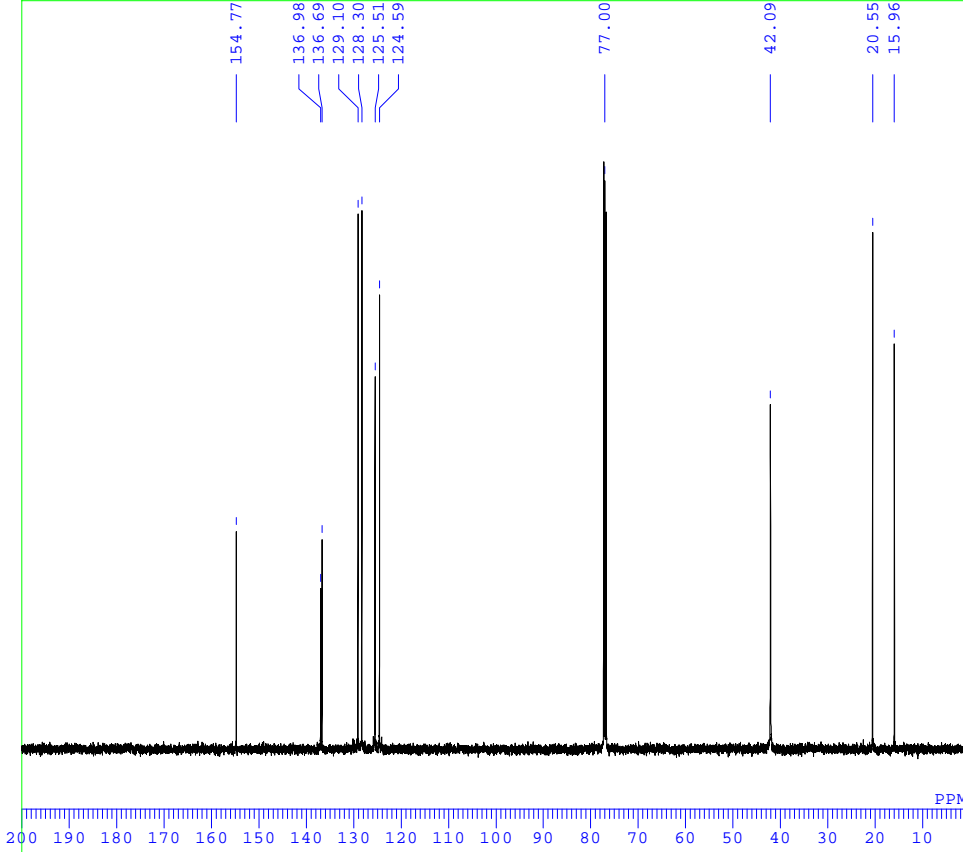

DFILE F-72 C-1.als  
 COMNT single\_pulse\_decoupled\_gat  
 DATIM 2014-10-14 11:30:58  
 OBNUC 13C  
 EXMOD single\_pulse\_dec  
 OBFREQ 125.77 MHz  
 OBSET 7.87 KHz  
 OBFIN 4.21 Hz  
 POINT 26214  
 FREQU 31446.06 Hz  
 SCANS 1024  
 ACQTM 0.8336 sec  
 PD 2.0000 sec  
 PW1 3.50 usec  
 IRNUC 1H  
 CTEMP 22.3 c  
 SLVNT CDCL3  
 EXREF 77.00 ppm  
 BF 1.20 Hz  
 RGAIN 52

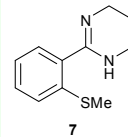

C:\Users\-\dŠw@<†%E@%@žũ•ä\Desktop\~•¶\, > Ĩ'¼\NMR data\9, E-41\E-41 reH-1.als

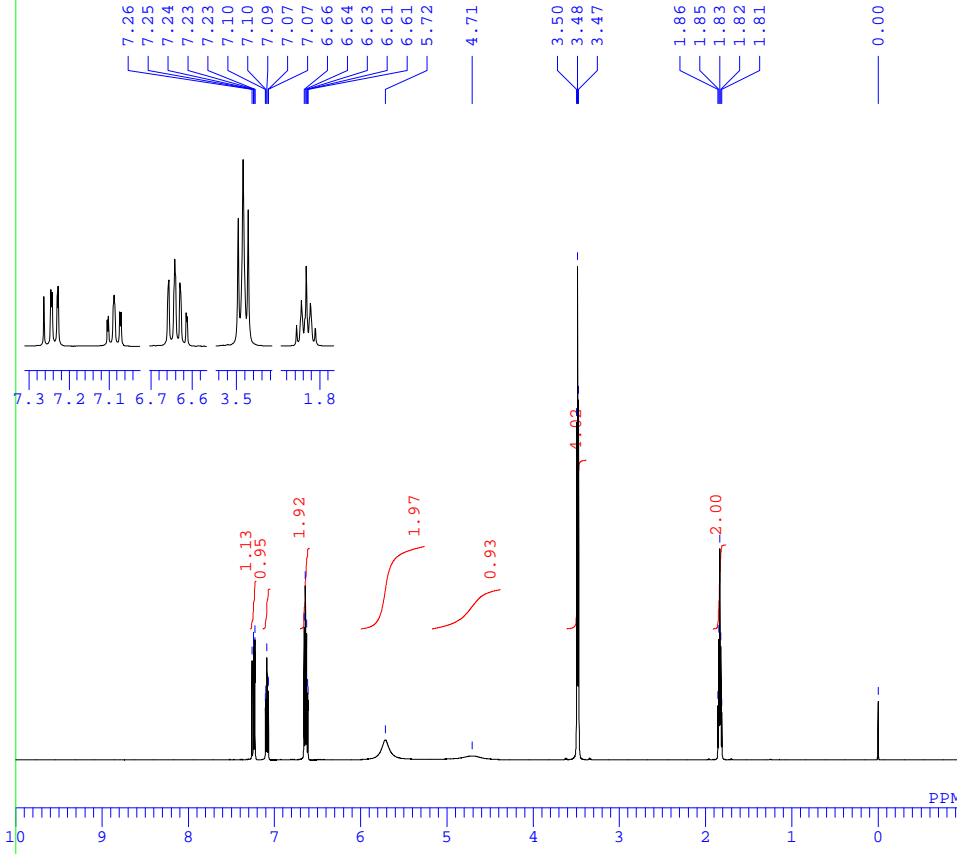

DFILE E-41 reH-1.als  
 COMNT single\_pulse  
 DATIM 2014-05-30 15:17:16  
 OBNUC 1H  
 EXMOD single\_pulse.ex2  
 OBFRO 500.16 MHz  
 OBSET 2.41 KHz  
 OBFIN 6.01 Hz  
 POINT 13107  
 FREQU 7507.39 Hz  
 SCANS 8  
 ACQTM 1.7459 sec  
 PD 5.0000 sec  
 PW1 6.82 usec  
 IRNUC 1H  
 CTEMP 20.6 c  
 SLVNT CDCL3  
 EXREF 0.00 ppm  
 BF 0.12 Hz  
 RGAIN 38

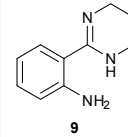

C:\Users\-\dŠw@<†%E@%@žũ•ä\Desktop\~•¶\, > Ĩ'¼\NMR data\9, E-41\E-41 reC-1.als

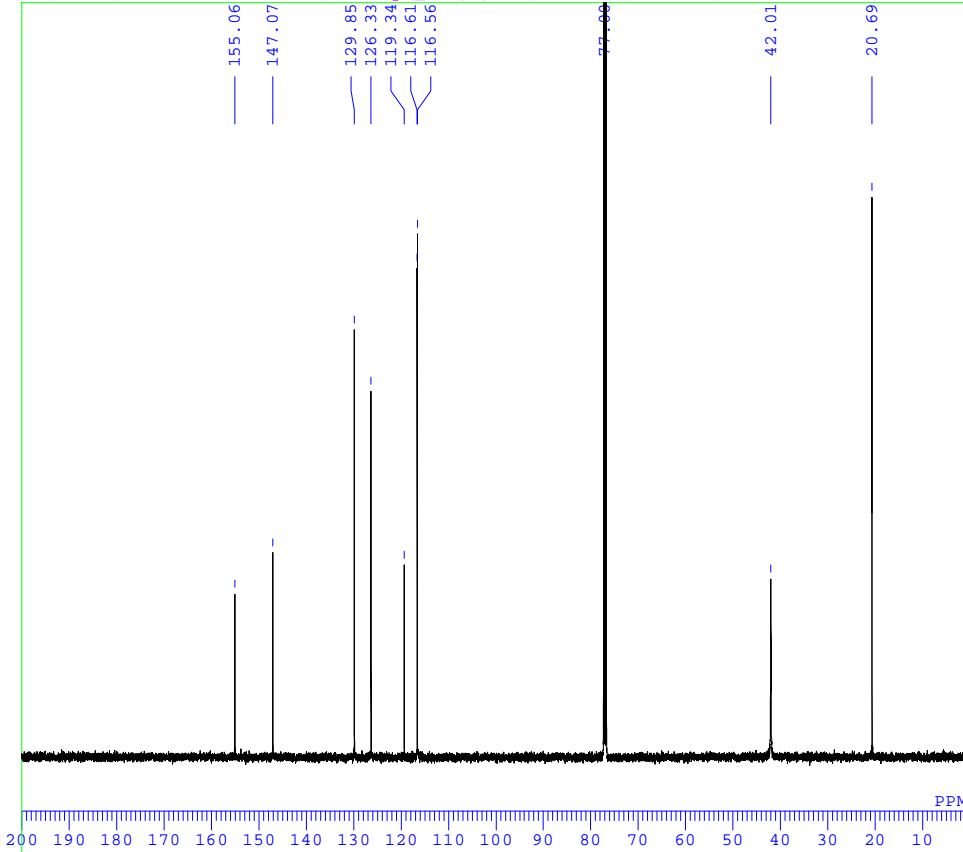

DFILE E-41 reC-1.als  
 COMNT single\_pulse\_decoupled\_gat  
 DATIM 2014-05-30 16:05:30  
 OBNUC 13C  
 EXMOD single\_pulse\_dec  
 OBFRO 125.77 MHz  
 OBSET 7.87 KHz  
 OBFIN 4.21 Hz  
 POINT 26214  
 FREQU 31446.06 Hz  
 SCANS 1000  
 ACQTM 0.8336 sec  
 PD 2.0000 sec  
 PW1 3.50 usec  
 IRNUC 1H  
 CTEMP 21.8 c  
 SLVNT CDCL3  
 EXREF 77.00 ppm  
 BF 1.20 Hz  
 RGAIN 54

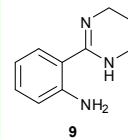

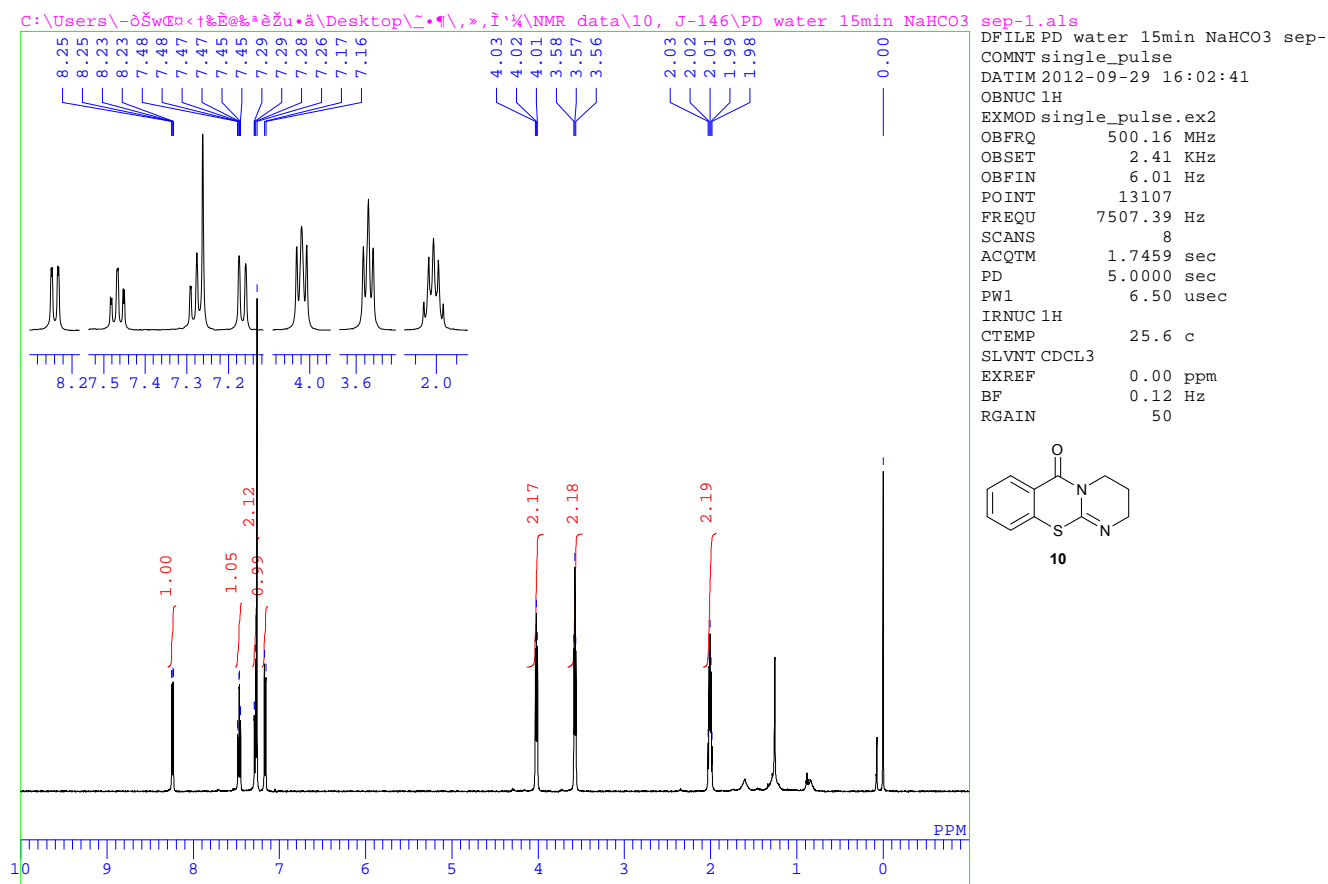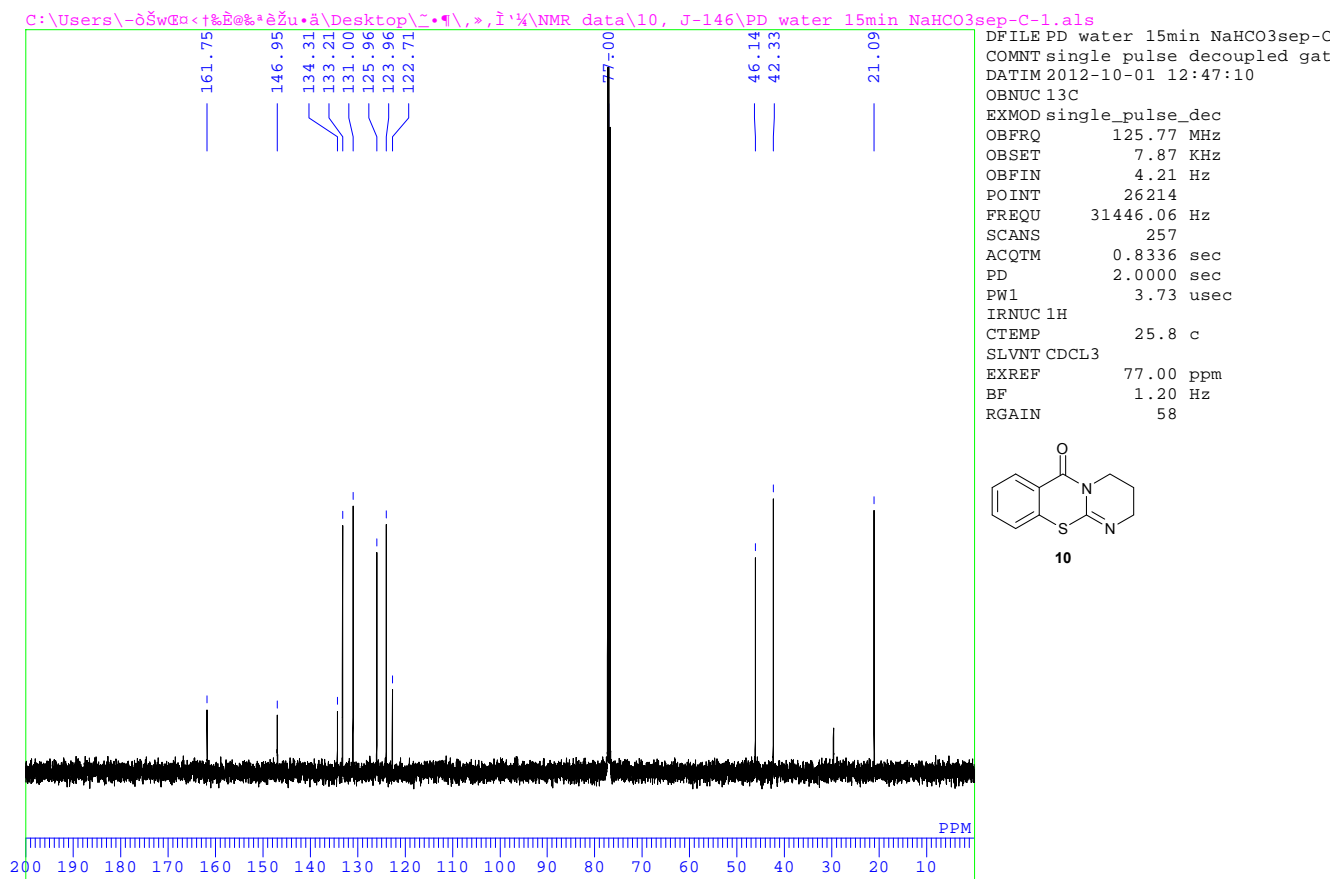

C:\Users\-\dŠw@<†%E@%\*@žũ•ã\Desktop\~•¶\, > ĩ'¼\NMR data\11, C-75\C-75-1.als

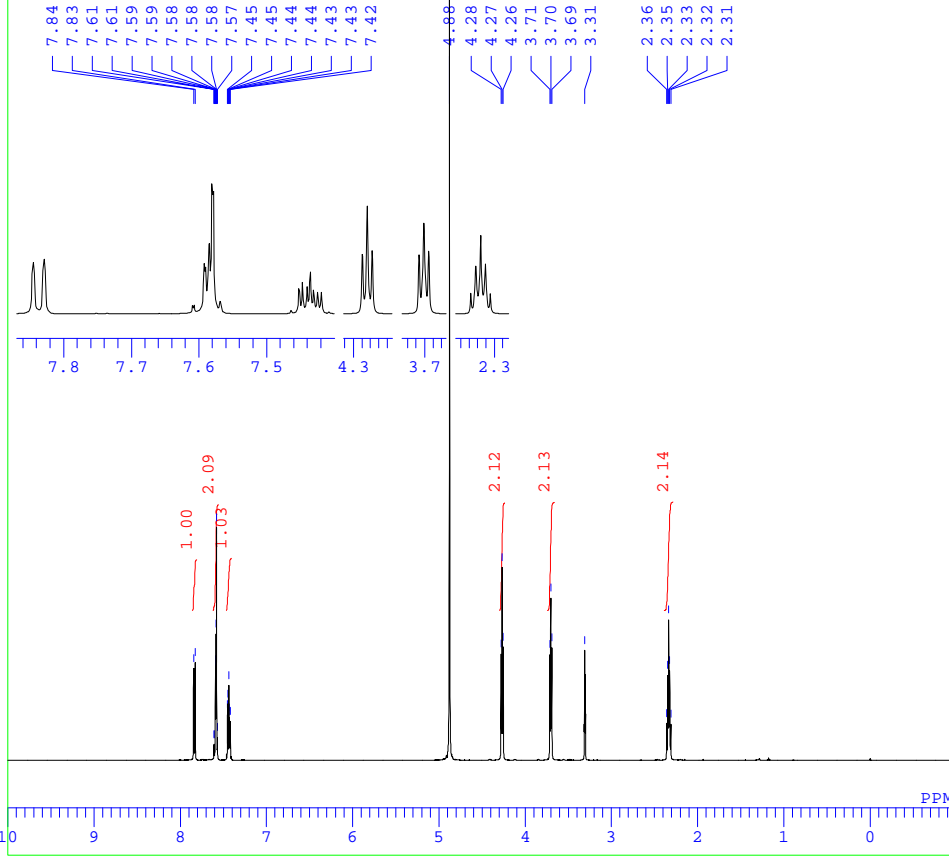

DFILE C-75-1.als  
 COMNT single\_pulse  
 DATIM 2013-08-26 14:27:47  
 OBNUC 1H  
 EXMOD single\_pulse.ex2  
 OBFRO 500.16 MHz  
 OBSSET 2.41 KHz  
 OBFIN 6.01 Hz  
 POINT 13107  
 FREQU 7507.39 Hz  
 SCANS 8  
 ACQTM 1.7459 sec  
 PD 5.0000 sec  
 PW1 6.50 usec  
 IRNUC 1H  
 CTEMP 24.8 c  
 SLVNT CD3OD  
 EXREF 0.00 ppm  
 BF 0.12 Hz  
 RGAIN 40

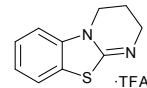

11

C:\Users\-\dŠw@<†%E@%\*@žũ•ã\Desktop\~•¶\, > ĩ'¼\NMR data\11, C-75\C-75 13C-1.als

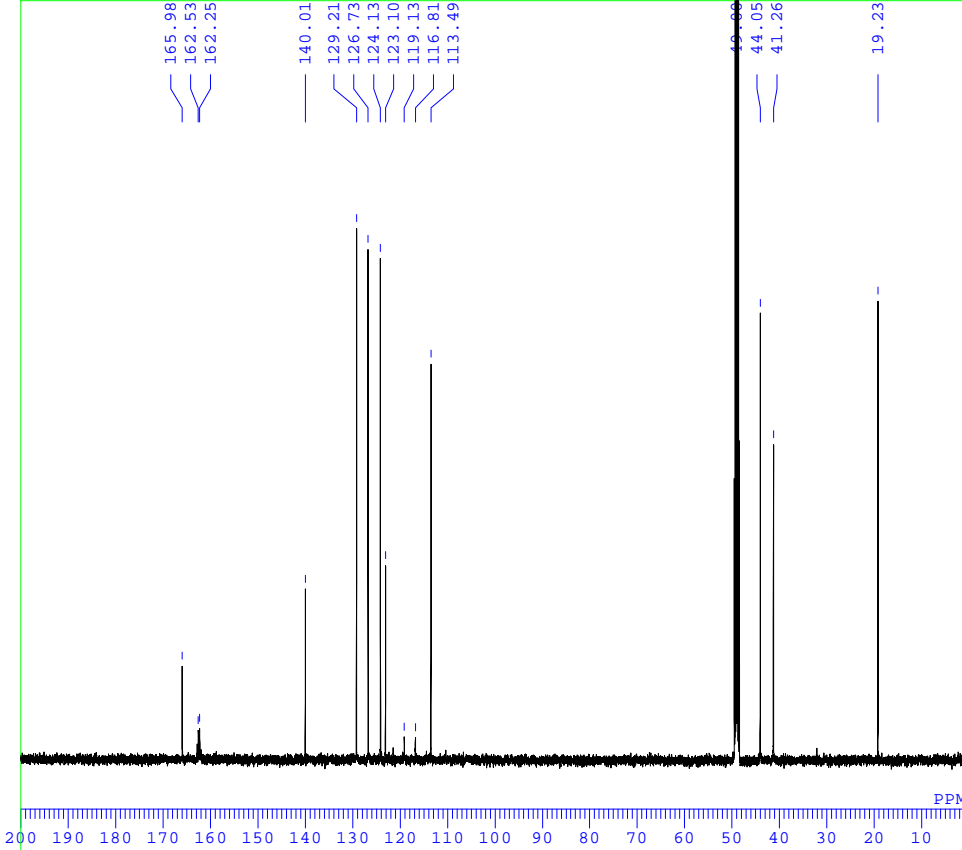

DFILE C-75 13C-1.als  
 COMNT single\_pulse\_decoupled\_gat  
 DATIM 2013-08-26 16:04:10  
 OBNUC 13C  
 EXMOD single\_pulse\_dec  
 OBFRO 125.77 MHz  
 OBSSET 7.87 KHz  
 OBFIN 4.21 Hz  
 POINT 26214  
 FREQU 31446.06 Hz  
 SCANS 1000  
 ACQTM 0.8336 sec  
 PD 2.0000 sec  
 PW1 3.73 usec  
 IRNUC 1H  
 CTEMP 25.2 c  
 SLVNT CD3OD  
 EXREF 49.00 ppm  
 BF 1.20 Hz  
 RGAIN 58

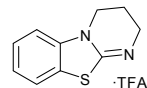

11

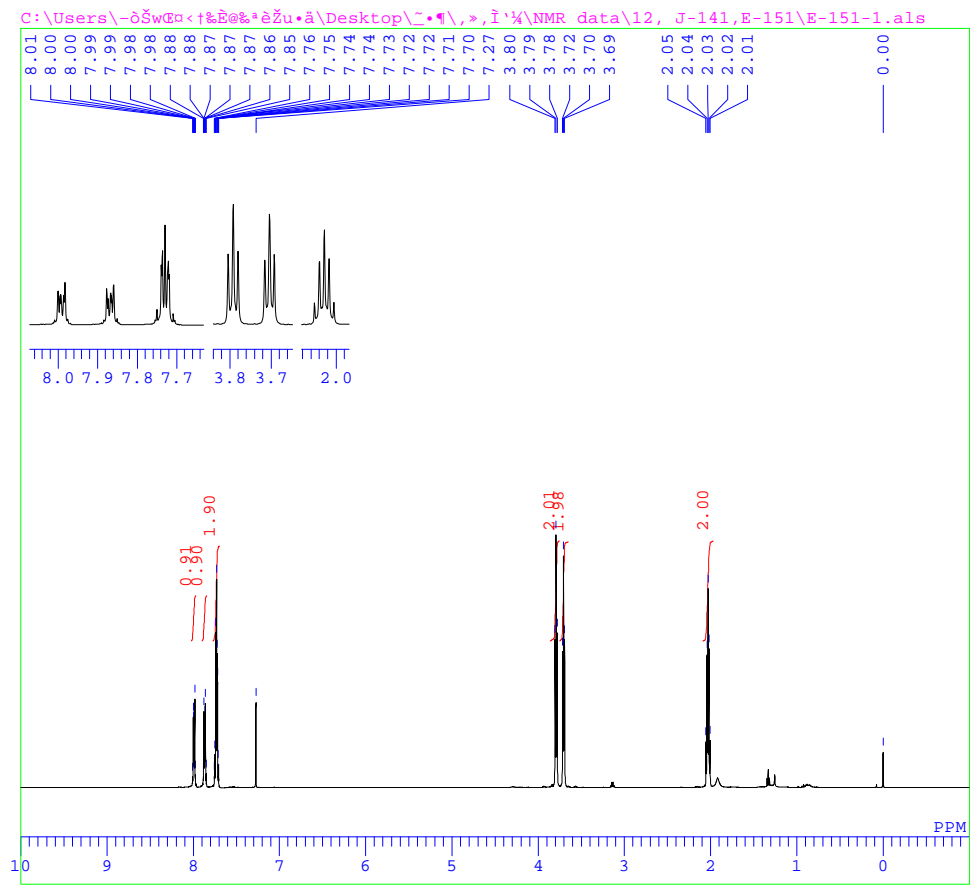

DFILE E-151-1.als  
 COMNT single\_pulse  
 DATIM 2014-06-06 15:31:16  
 OBNUC 1H  
 EXMOD single\_pulse.ex2  
 OBFRO 500.16 MHz  
 OBSSET 2.41 KHz  
 OBFIN 6.01 Hz  
 POINT 13107  
 FREQU 7507.39 Hz  
 SCANS 8  
 ACQTM 1.7459 sec  
 PD 5.0000 sec  
 PW1 6.82 usec  
 IRNUC 1H  
 CTEMP 24.4 c  
 SLVNT CDCL3  
 EXREF 0.00 ppm  
 BF 0.12 Hz  
 RGAIN 42

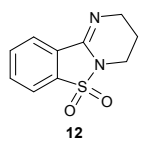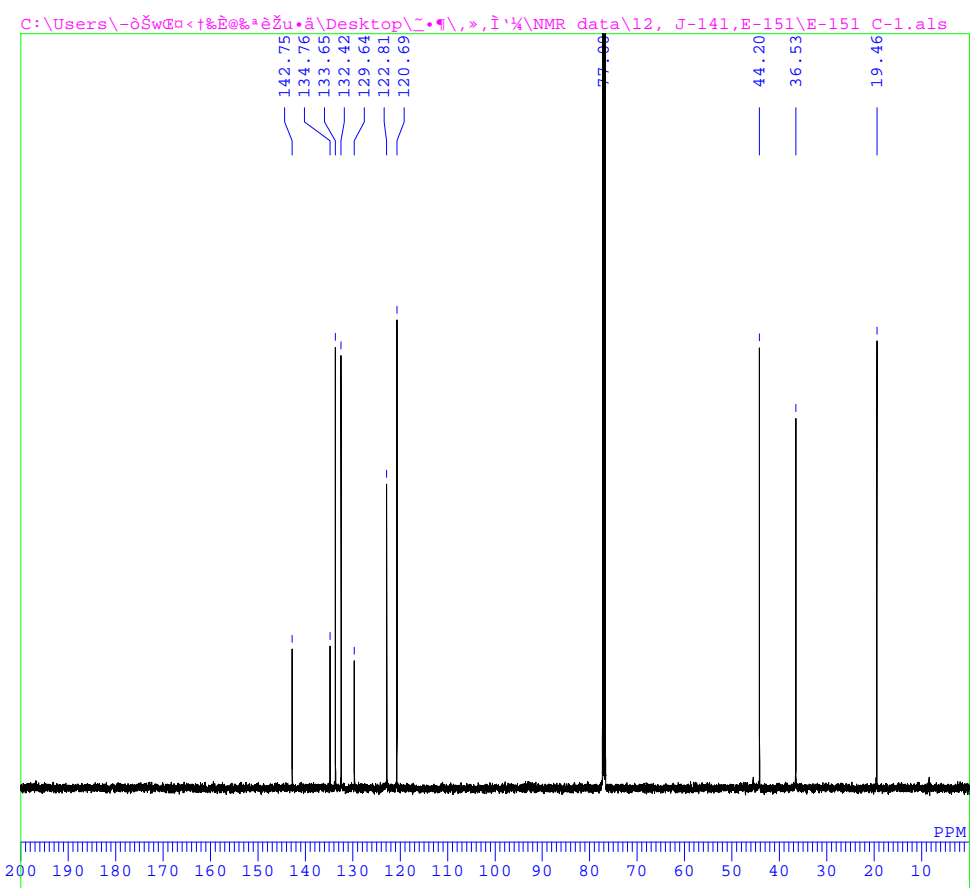

DFILE E-151 C-1.als  
 COMNT single\_pulse\_decoupled\_gat  
 DATIM 2014-06-06 16:19:21  
 OBNUC 13C  
 EXMOD single\_pulse\_dec  
 OBFRO 125.77 MHz  
 OBSSET 7.87 KHz  
 OBFIN 4.21 Hz  
 POINT 26214  
 FREQU 31446.06 Hz  
 SCANS 1000  
 ACQTM 0.8336 sec  
 PD 2.0000 sec  
 PW1 3.50 usec  
 IRNUC 1H  
 CTEMP 24.6 c  
 SLVNT CDCL3  
 EXREF 77.00 ppm  
 BF 1.20 Hz  
 RGAIN 54

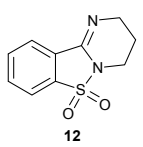



C:\Users\-\dŠw@<+&E@%\*əŽu.ä\Desktop\~.¶, > ,İ'¼\NMR data\16, E-87\E-87-1.als

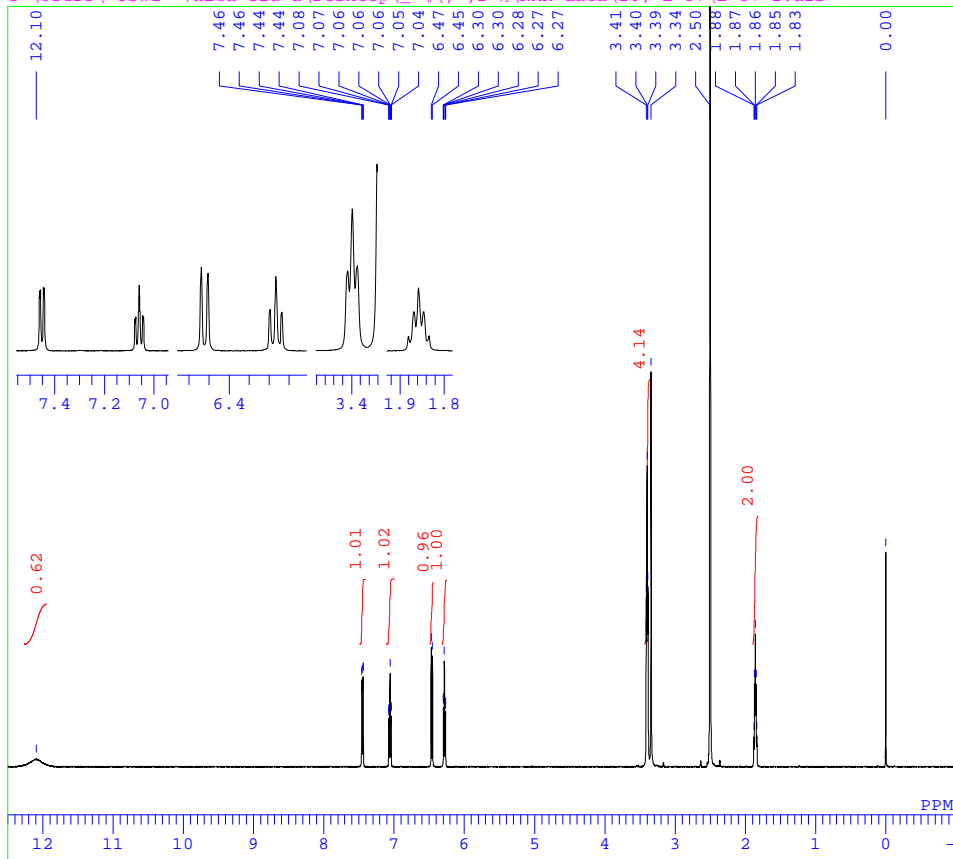

DFILE E-87-1.als  
 COMNT single\_pulse  
 DATIM 2014-05-14 11:49:49  
 OBNUC 1H  
 EXMOD single\_pulse.ex2  
 OBFREQ 500.16 MHz  
 OBSSET 2.41 KHz  
 OBFIN 6.01 Hz  
 POINT 13107  
 FREQU 7507.39 Hz  
 SCANS 8  
 ACQTM 1.7459 sec  
 PD 5.0000 sec  
 PW1 6.82 usec  
 IRNUC 1H  
 CTEMP 20.3 c  
 SLVNT DMSO  
 EXREF 0.00 ppm  
 BF 0.12 Hz  
 RGAIN 48

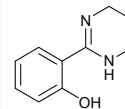

16

C:\Users\-\dŠw@<+&E@%\*əŽu.ä\Desktop\~.¶, > ,İ'¼\NMR data\16, E-87\E-87 C-1.als

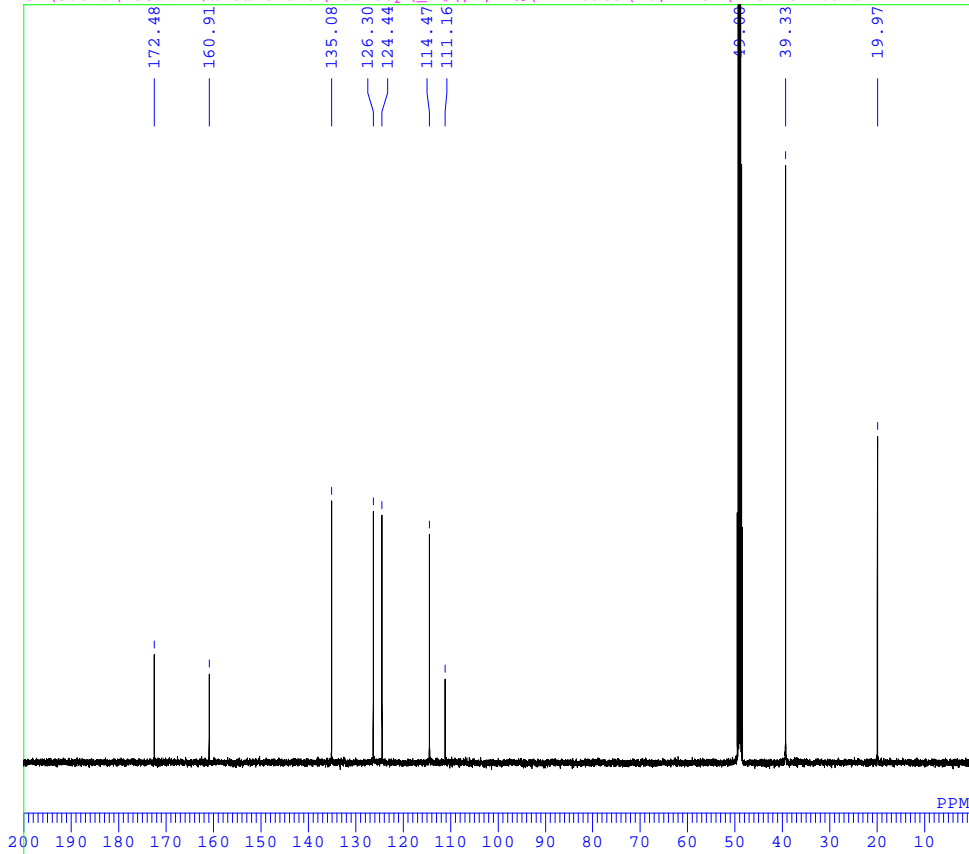

DFILE E-87 C-1.als  
 COMNT single\_pulse\_decoupled\_gat  
 DATIM 2014-05-14 23:05:11  
 OBNUC 13C  
 EXMOD single\_pulse\_dec  
 OBFREQ 125.77 MHz  
 OBSSET 7.87 KHz  
 OBFIN 4.21 Hz  
 POINT 26214  
 FREQU 31446.06 Hz  
 SCANS 650  
 ACQTM 0.8336 sec  
 PD 2.0000 sec  
 PW1 3.50 usec  
 IRNUC 1H  
 CTEMP 20.1 c  
 SLVNT CD3OD  
 EXREF 49.00 ppm  
 BF 1.20 Hz  
 RGAIN 54

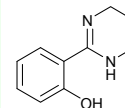

16
